# Supplementary material for: Changes in the tropical upper-tropospheric zonal momentum balance due to global warming
Source: Copernicus journal article supplement (doi:10.5194/wcd-5-839-2024), 2024-06-18
Supplement: Supplementary file 1 [file wcd-5-839-2024-supplement.pdf]

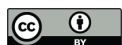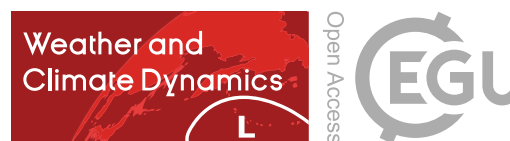

*Supplement of*

## **Changes in the tropical upper-tropospheric zonal momentum balance due to global warming**

**Abu Bakar Siddiqui Thakur and Jai Sukhatme**

*Correspondence to:* Abu Bakar Siddiqui Thakur (thakur.abubakar@gmail.com)

The copyright of individual parts of the supplement might differ from the article licence.

## Supplement

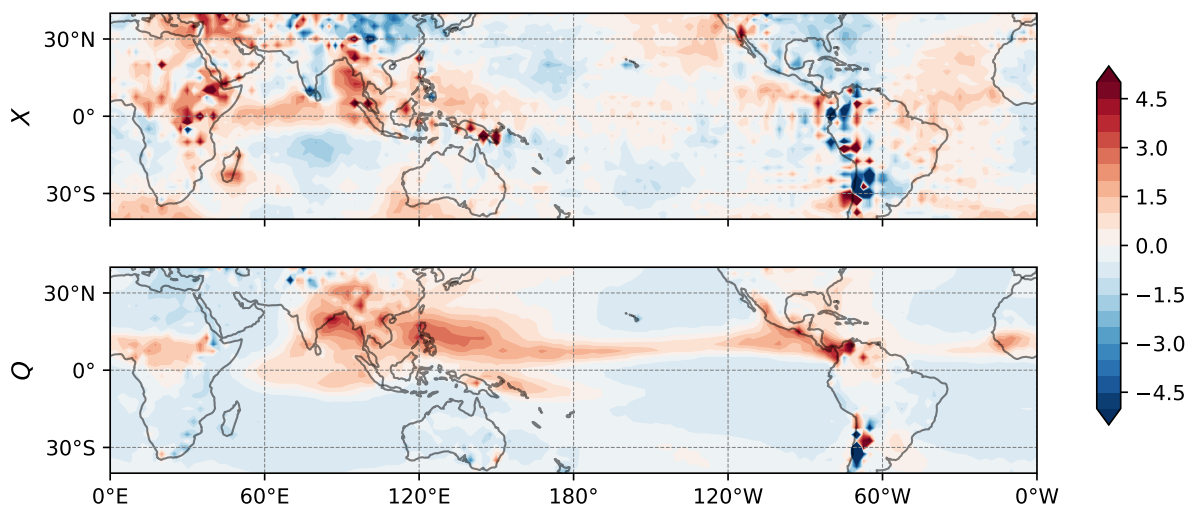

**Figure S1.** JJAS and 150-300 mbar averaged (top) Momentum budget residual (unit  $\text{ms}^{-1}\text{day}^{-1}$ ) and (bottom) diabatic heating rate (unit  $\text{K day}^{-1}$ ) estimated as a residual from the thermodynamic energy equation (Holton and Hakim, 2012).  $X$  is calculated using the advective form of the momentum equation (for e.g., Lin et al., 2008)

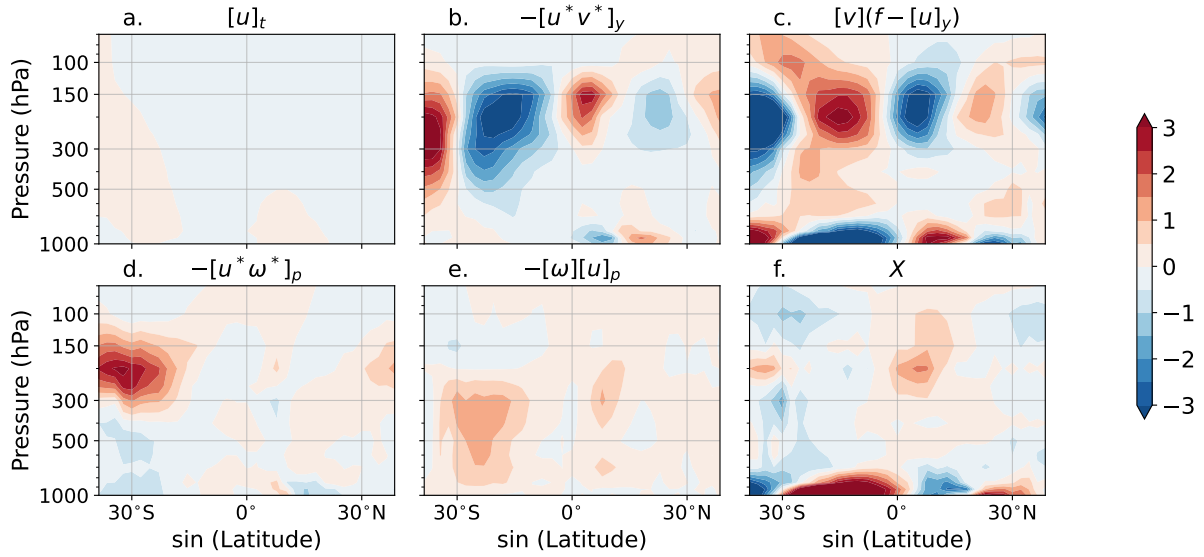

**Figure S2.** Climatological latitude-pressure profile of all terms in the zonal mean zonal momentum budget averaged over JJA.

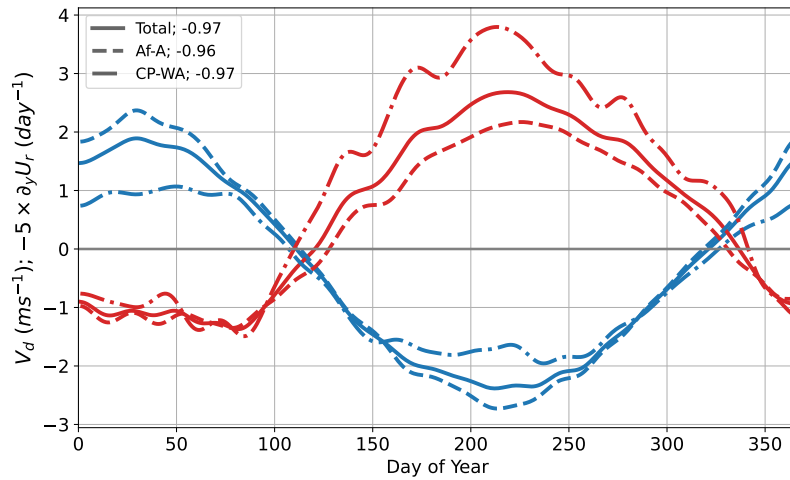

**Figure S3.** Climatological Day of Year variation of  $v_d$  (blue) and  $-5 \times \partial_y u_r$  (red) zonally averaged over all longitudes (solid), A-Af (dashed), CP-WA (dash-dotted) and Africa (dotted). As Figures 1 and 3, all quantities are averaged over 150-300 hPa, about  $\pm 5^\circ$ .  $-\partial_y u_r$  has been multiplied by 5 to ensure a vertical scale similar to  $v_d$ . A 20-day low-pass filter has been applied prior to presentation.

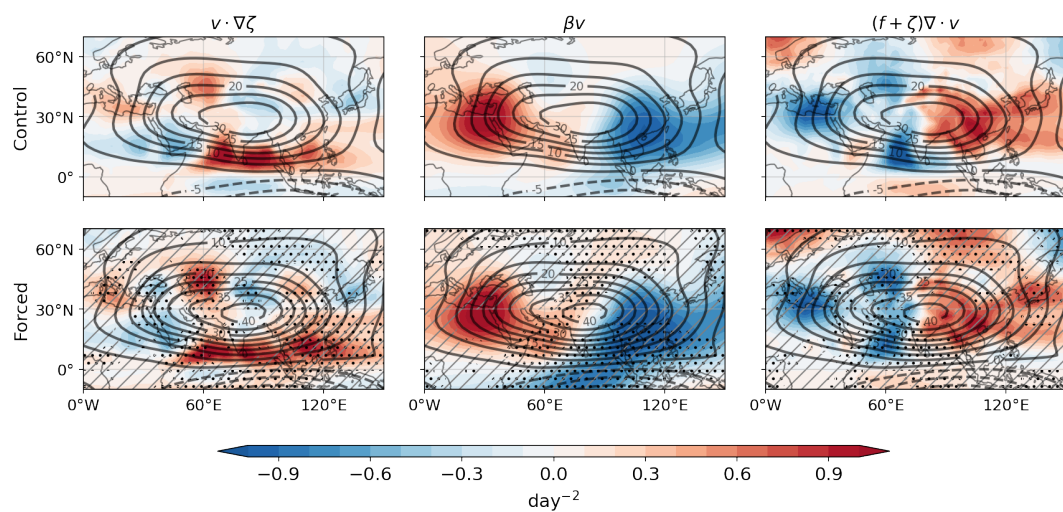

**Figure S4.** All terms in the upper atmospheric steady-state vorticity budget (Sardeshmukh and Held, 1984). The top panels are for the control run while the bottom panels are for forced.

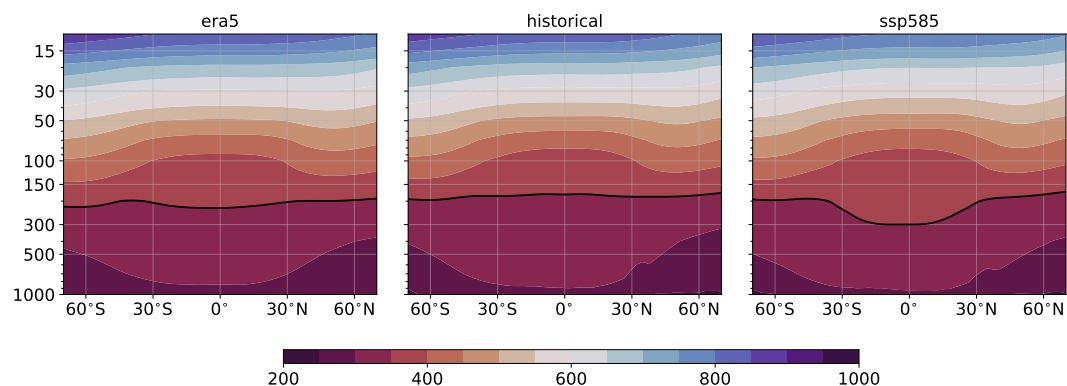

**Figure S5.** Latitude-height section of zonal mean potential temperature for (left) historical and (right) ssp585.

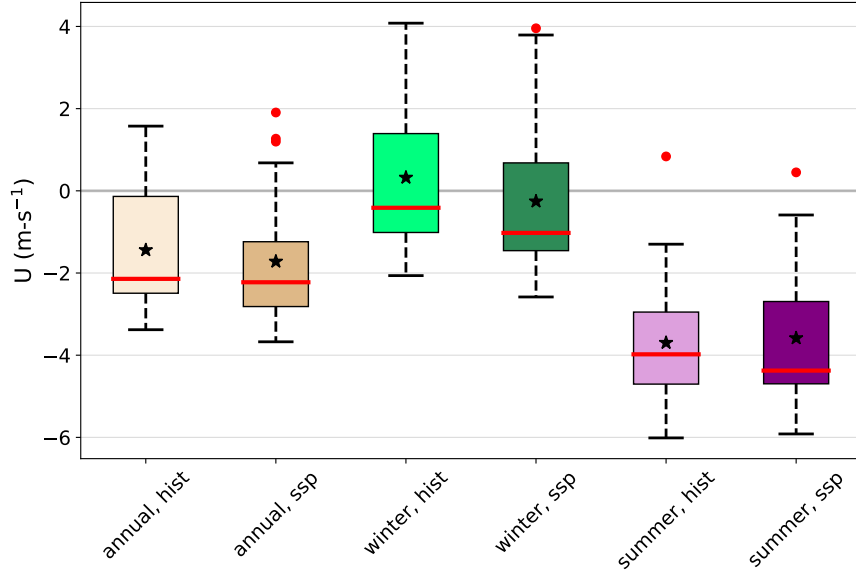

**Figure S6.** Temporally and zonally averaged zonal wind spread for the CMIP6 fully coupled simulations for averaged over  $\pm 5^\circ$  of the equator and 150-300 mbar. The data represented are annual, winter, and summer season means for the control and forced multi-model ensembles. Points marked with black stars indicate the mean, while the horizontal red lines indicate the median. The lower value indicated by the box plot is the first quartile ( $Q_1$ ), while the upper value is the third quartile ( $Q_3$ ). For each box plot, the reach of the whiskers is  $1.5 \times IQR$  beyond  $Q_1$  and  $Q_3$ , where  $IQR = Q_3 - Q_1$ . The red dots are outliers.

## References

Holton, J. and Hakim, G.: An Introduction to Dynamic Meteorology, Academic Press, New York, 5 edn., 2012.

Lin, J.-L., Mapes, B. E., and Han, W.: What are the sources of mechanical damping in Matsuno–Gill-type models?, *Journal of Climate*, 21, 165–179, <https://doi.org/10.1175/2007JCLI1546.1>, 2008.

- 5 Sardeshmukh, P. D. and Held, I. M.: The vorticity balance in the tropical upper troposphere of a general circulation model, *Journal of Atmospheric Sciences*, 41, 768–778, [https://doi.org/10.1175/1520-0469\(1984\)041<3C0768:TVBITT>2.0.CO;2](https://doi.org/10.1175/1520-0469(1984)041<3C0768:TVBITT>2.0.CO;2), 1984.
